# Supplementary material
Source: PubMed Central journal article supplement (PMC2833364)
Supplement: mmc1.pdf [file mmc1.pdf]

## A Weighted False Discovery Rate

### Control Procedure Reveals Alleles at *FOXA2*

### that Influence Fasting Glucose Levels

Chao Xing, Jonathan C. Cohen, and Eric Boerwinkle

**Table S1. Frequency Distribution of SNPs<sup>a</sup> from the Affymetrix Genome-wide Human SNP 6.0 Stratified by MAF in the ARIC Data and the Affymetrix Experimental Data**

| MAF         | ARIC  |       | Affymetrix |       | Consistency <sup>b</sup> |        |
|-------------|-------|-------|------------|-------|--------------------------|--------|
|             | EA    | AA    | CEU        | YRI   | EA-CEU                   | AA-YRI |
| (0,0.05)    | 24.5% | 11.7% | 24.3%      | 16.3% | 87.0%                    | 53.7%  |
| [0.05,0.10) | 10.7% | 14.9% | 10.7%      | 13.3% |                          |        |
| [0.10,0.20) | 18.8% | 24.8% | 18.7%      | 23.0% |                          |        |
| [0.20,0.30) | 16.4% | 19.0% | 16.4%      | 18.0% | 93.3%                    | 86.9%  |
| [0.30,0.40) | 15.2% | 15.6% | 14.9%      | 15.0% |                          |        |
| [0.40,0.50] | 14.4% | 14.0% | 14.8%      | 14.2% |                          |        |

<sup>a</sup>SNPs passing the quality control: 814,004 SNPs in the EAs and 818,899 SNPs in the AAs.

<sup>b</sup>The consistency is calculated as the proportion  $(EA \cap CEU) / (EA \cup CEU)$  or  $(AA \cap YRI) / (AA \cup YRI)$  in a category of SNPs.

**Table S2. Frequency Distribution of Nonsynonymous SNPs<sup>a</sup> from the Affymetrix Genome-wide Human SNP 6.0 Stratified by MAF in the ARIC Data and the Affymetrix Experimental Data**

| MAF         | ARIC  |       | Affymetrix |       |
|-------------|-------|-------|------------|-------|
|             | EA    | AA    | CEU        | YRI   |
| (0,0.05)    | 35.1% | 26.2% | 35.2%      | 29.3% |
| [0.05,0.10) | 12.2% | 16.0% | 11.7%      | 14.7% |
| [0.10,0.20) | 17.2% | 21.8% | 17.3%      | 21.1% |
| [0.20,0.30) | 13.7% | 14.4% | 13.9%      | 13.5% |
| [0.30,0.40) | 11.5% | 11.3% | 11.5%      | 11.1% |
| [0.40,0.50] | 10.2% | 10.3% | 9.9%       | 9.8%  |

<sup>a</sup>SNPs passing the quality control: 4,130 SNPs in the EAs and 4,208 SNPs in the AAs. They were annotated as nsSNPs if resulting in nonsense, missense, and frameshift mutations according to the dbSNP database.

**Table S3. A Complete List of SNPs Attaining the Level of Genome-wide Significance in the Genome-wide Scan of Fasting Glucose Levels in the EA Population of the ARIC Study**

| SNP        | Region   | MAF    | Rank | <i>p</i> -value       |                       |                       |                       | Effect per minor allele<br>mean±standard error<br>(mg/dl) |
|------------|----------|--------|------|-----------------------|-----------------------|-----------------------|-----------------------|-----------------------------------------------------------|
|            |          |        |      | Raw                   | Bonferroni            | BH                    | WBH                   |                                                           |
| rs10830963 | 11q21    | 0.28   | 1    | $3.3 \times 10^{-19}$ | $2.7 \times 10^{-13}$ | $3.8 \times 10^{-12}$ | $3.0 \times 10^{-10}$ | 1.46 ± 0.16                                               |
| rs552976   | 2q24.3   | 0.35   | 2    | $3.3 \times 10^{-16}$ | $2.7 \times 10^{-10}$ | $1.6 \times 10^{-9}$  | $1.4 \times 10^{-7}$  | -1.15 ± 0.14                                              |
| rs853789   | 2q24.3   | 0.35   | 3    | $4.0 \times 10^{-16}$ | $3.3 \times 10^{-10}$ | $1.6 \times 10^{-9}$  | $1.4 \times 10^{-7}$  | -1.18 ± 0.15                                              |
| rs560887   | 2q24.3   | 0.30   | 4    | $1.3 \times 10^{-15}$ | $1.0 \times 10^{-9}$  | $3.6 \times 10^{-9}$  | $3.2 \times 10^{-7}$  | -1.19 ± 0.15                                              |
| rs563694   | 2q24.3   | 0.35   | 5    | $1.9 \times 10^{-15}$ | $1.5 \times 10^{-9}$  | $4.3 \times 10^{-9}$  | $3.9 \times 10^{-7}$  | -1.13 ± 0.15                                              |
| rs508506   | 2q24.3   | 0.34   | 6    | $1.1 \times 10^{-14}$ | $8.8 \times 10^{-9}$  | $2.1 \times 10^{-8}$  | $1.9 \times 10^{-6}$  | -1.12 ± 0.15                                              |
| rs11523890 | 11q21    | 0.34   | 7    | $1.7 \times 10^{-12}$ | $1.3 \times 10^{-6}$  | $2.7 \times 10^{-6}$  | $7.8 \times 10^{-5}$  | 1.04 ± 0.15                                               |
| rs2908289  | 7p13     | 0.17   | 8    | $2.6 \times 10^{-12}$ | $2.1 \times 10^{-6}$  | $3.8 \times 10^{-6}$  | $7.8 \times 10^{-5}$  | 1.37 ± 0.20                                               |
| rs10830962 | 11q21    | 0.40   | 9    | $2.6 \times 10^{-11}$ | $2.1 \times 10^{-5}$  | $3.3 \times 10^{-5}$  | $7.8 \times 10^{-5}$  | 0.94 ± 0.14                                               |
| rs1799884  | 7p13     | 0.17   | 10   | $3.4 \times 10^{-11}$ | $2.8 \times 10^{-5}$  | $3.8 \times 10^{-5}$  | $7.8 \times 10^{-5}$  | 1.25 ± 0.19                                               |
| rs12792753 | 11q21    | 0.36   | 11   | $3.6 \times 10^{-11}$ | $2.9 \times 10^{-5}$  | $3.8 \times 10^{-5}$  | $7.8 \times 10^{-5}$  | 0.97 ± 0.15                                               |
| rs2908282  | 7p13     | 0.17   | 12   | $9.4 \times 10^{-11}$ | $7.7 \times 10^{-5}$  | $9.1 \times 10^{-5}$  | $7.8 \times 10^{-5}$  | 1.22 ± 0.19                                               |
| rs1442017  | 13q21.32 | 0.0018 | 13   | $1.3 \times 10^{-10}$ | $1.1 \times 10^{-4}$  | $1.2 \times 10^{-4}$  | $7.8 \times 10^{-5}$  | -36.6 ± 8.46                                              |
| rs853773   | 2q24.3   | 0.48   | 14   | $1.2 \times 10^{-9}$  | $9.6 \times 10^{-4}$  | $9.7 \times 10^{-4}$  | $6.1 \times 10^{-4}$  | -0.85 ± 0.14                                              |
| rs853784   | 2q24.3   | 0.47   | 15   | $1.8 \times 10^{-9}$  | $1.5 \times 10^{-3}$  | $1.3 \times 10^{-3}$  | $6.1 \times 10^{-4}$  | -0.82 ± 0.14                                              |
| rs4611171  | 11q21    | 0.48   | 16   | $1.9 \times 10^{-9}$  | $1.5 \times 10^{-3}$  | $1.3 \times 10^{-3}$  | $6.1 \times 10^{-4}$  | -0.82 ± 0.14                                              |
| rs3847554  | 11q21    | 0.42   | 17   | $2.3 \times 10^{-9}$  | $1.8 \times 10^{-3}$  | $1.5 \times 10^{-3}$  | $6.1 \times 10^{-4}$  | 0.86 ± 0.14                                               |
| rs853779   | 2q24.3   | 0.47   | 18   | $3.3 \times 10^{-9}$  | $2.7 \times 10^{-3}$  | $2.1 \times 10^{-3}$  | $6.1 \times 10^{-4}$  | -0.82 ± 0.14                                              |
| rs853778   | 2q24.3   | 0.47   | 19   | $3.5 \times 10^{-9}$  | $2.9 \times 10^{-3}$  | $2.1 \times 10^{-3}$  | $6.1 \times 10^{-4}$  | -0.82 ± 0.14                                              |
| rs853776   | 2q24.3   | 0.47   | 20   | $3.8 \times 10^{-9}$  | $3.1 \times 10^{-3}$  | $2.2 \times 10^{-3}$  | $6.1 \times 10^{-4}$  | -0.81 ± 0.14                                              |
| rs2685805  | 2q24.3   | 0.47   | 21   | $4.0 \times 10^{-9}$  | $3.2 \times 10^{-3}$  | $2.2 \times 10^{-3}$  | $6.1 \times 10^{-4}$  | -0.81 ± 0.14                                              |
| rs2685813  | 2q24.3   | 0.46   | 22   | $8.0 \times 10^{-9}$  | $6.5 \times 10^{-3}$  | $3.7 \times 10^{-3}$  | $6.8 \times 10^{-4}$  | -0.79 ± 0.14                                              |
| rs567074   | 2q24.3   | 0.46   | 23   | $8.2 \times 10^{-9}$  | $6.7 \times 10^{-3}$  | $3.7 \times 10^{-3}$  | $7.0 \times 10^{-4}$  | -0.79 ± 0.14                                              |
| rs10765576 | 11q21    | 0.44   | 24   | $8.2 \times 10^{-9}$  | $6.7 \times 10^{-3}$  | $3.7 \times 10^{-3}$  | $7.0 \times 10^{-4}$  | -0.80 ± 0.14                                              |
| rs2685812  | 2q24.3   | 0.46   | 25   | $1.2 \times 10^{-8}$  | $1.0 \times 10^{-2}$  | $5.3 \times 10^{-3}$  | $1.0 \times 10^{-3}$  | -0.78 ± 0.14                                              |
| rs853772   | 2q24.3   | 0.48   | 26   | $1.4 \times 10^{-8}$  | $1.1 \times 10^{-2}$  | $5.6 \times 10^{-3}$  | $1.1 \times 10^{-3}$  | -0.78 ± 0.14                                              |

|            |          |       |    |                      |                      |                      |                      |                  |
|------------|----------|-------|----|----------------------|----------------------|----------------------|----------------------|------------------|
| rs853780   | 2q24.3   | 0.47  | 27 | $1.7 \times 10^{-8}$ | $1.4 \times 10^{-2}$ | $6.7 \times 10^{-3}$ | $1.4 \times 10^{-3}$ | $-0.77 \pm 0.14$ |
| rs2300584  | 7p13     | 0.22  | 28 | $2.4 \times 10^{-8}$ | $1.9 \times 10^{-2}$ | $9.1 \times 10^{-3}$ | $2.0 \times 10^{-3}$ | $0.90 \pm 0.17$  |
| rs565412   | 2q24.3   | 0.47  | 29 | $3.0 \times 10^{-8}$ | $2.5 \times 10^{-2}$ | $1.1 \times 10^{-2}$ | $2.6 \times 10^{-3}$ | $-0.75 \pm 0.14$ |
| rs472614   | 2q24.3   | 0.47  | 30 | $9.1 \times 10^{-8}$ | $7.4 \times 10^{-2}$ | $2.2 \times 10^{-2}$ | $5.2 \times 10^{-3}$ | $-0.73 \pm 0.14$ |
| rs6048209  | 20p11.21 | 0.042 | 31 | $1.4 \times 10^{-7}$ | $1.2 \times 10^{-1}$ | $7.0 \times 10^{-2}$ | $1.2 \times 10^{-2}$ | $-1.64 \pm 0.34$ |
| rs11020107 | 11q21    | 0.33  | 32 | $2.9 \times 10^{-7}$ | $2.3 \times 10^{-1}$ | $9.7 \times 10^{-2}$ | $2.4 \times 10^{-2}$ | $0.76 \pm 0.15$  |
| rs532779   | 2q24.3   | 0.29  | 33 | $3.2 \times 10^{-7}$ | $2.6 \times 10^{-1}$ | $1.1 \times 10^{-1}$ | $2.7 \times 10^{-2}$ | $-0.75 \pm 0.15$ |
| rs780094   | 2p23.3   | 0.40  | 34 | $3.8 \times 10^{-7}$ | $3.1 \times 10^{-1}$ | $1.2 \times 10^{-1}$ | $3.2 \times 10^{-2}$ | $-0.77 \pm 0.14$ |
| rs1928529  | 6p12.3   | 0.28  | 35 | $4.4 \times 10^{-7}$ | $3.6 \times 10^{-1}$ | $1.3 \times 10^{-1}$ | $3.7 \times 10^{-2}$ | $-0.76 \pm 0.15$ |
| rs6816503  | 4q31.23  | 0.072 | 36 | $4.4 \times 10^{-7}$ | $3.6 \times 10^{-1}$ | $1.3 \times 10^{-1}$ | $3.7 \times 10^{-2}$ | $-1.38 \pm 0.27$ |

**Table S4. MAF of SNPs at 20p11.21 Associated with Fasting Glucose Levels with  $p$ -Value  $\leq 1.0 \times 10^{-4}$  in the EA Population of the ARIC Study**

| SNP       | ARIC  |       | Affymetrix |      |
|-----------|-------|-------|------------|------|
|           | EA    | AA    | CEU        | YRI  |
| rs6036140 | 0.045 | 0.37  | 0.033      | 0.44 |
| rs6036142 | 0.045 | 0.32  | 0.033      | 0.39 |
| rs6082742 | 0.055 | 0.45  | 0.033      | 0.24 |
| rs6036144 | 0.045 | 0.17  | 0.025      | 0.25 |
| rs945982  | 0.063 | 0.41  | 0.042      | 0.28 |
| rs6048183 | 0.049 | 0.096 | 0.042      | 0.13 |
| rs2277762 | 0.052 | 0.098 | 0.042      | 0.13 |
| rs6113722 | 0.047 | 0.16  | 0.033      | 0.20 |
| rs1203907 | 0.050 | 0.50  | 0.033      | 0.34 |
| rs6048206 | 0.047 | 0.33  | 0.033      | 0.43 |
| rs1055080 | 0.045 | 0.41  | 0.033      | 0.23 |
| rs1209523 | 0.043 | 0.37  | 0.025      | 0.43 |
| rs6048209 | 0.042 | 0.39  | 0.025      | 0.46 |
